# Supplementary material for: Prevalence and Determinants of Anxiety Disorders Among Patients with Chronic Illnesses at the University of Abuja Teaching Hospital, Gwagwalada, Abuja
Source: Research Square preprint supplement (doi:10.21203/rs.3.rs-8207154/v1), 2026-01-21
Supplement: Supplementary file 1 [file 8249f40adfe7fc269d52e7ab.docx]

APPENDIX I

QUESTIONNAIRE

ASSESSMENT OF ANXIETY DISORDERS IN PATIENTS WITH CHRONIC ILLNESS IN THE UNIVERSITY OF ABUJA TEACHING HOSPITAL

INSTRUCTIONS

This is not a test; there are no right or wrong answers but please answer carefully. For each

question, pick the answer that fits you the best and kindly tick [√] the box.

SECTION A: BIODATA

1. Age: _____________

2. Sex: (a) Male [ ] (b) Female [ ]

3. Marital status: (a) Single [ ] (b) Married [ ] (c) Separated [ ] (d) Divorced [ ]

4. Religion: (a) Islam [ ] (b) Christianity [ ] (c) Traditionalist [ ] (c) others [ ]

5. How much do you make in a month

Less than 100,000[ ] 100,000 to 500,000[ ] More than 500,000[ ]

SECTION B: SEVERITY OF ANXIETY

Instructions: Please read each item and select the response that best describes how you have felt during the past week, including today

6. I feel tense or 'wound up'

Most of the time( ) A lot of the time( ) From time to time, occasionally( ) Not at all( )

7. I get a sort of frightened feeling as if something awful is about to happen

Very definitely and quite badly( ) Yes, but not too badly( ) A little, but it doesn’t worry me ( )

Not at all (0)

8. Worrying thoughts go through my mind

A great deal of the time ( ) A lot of the time( ) From time to time, but not too often( ) Only

occasionally( )

9. I can sit at ease and feel relaxed

Definitely( ) Usually( ) Not often( ) Not at all( )

10. I get a sort of frightened feeling like ‘butterflies’ in the stomach

Very often( ) Quite often( ) Occasionally( ) Not at all( )

11. I feel restless as if I have to be on the move

Very much indeed( ) Quite a lot( ) Not very much( ) Not at all( )

12. I get sudden feelings of panic

Very often indeed( ) Quite often( ) Not very often( ) Not at all( )

SECTION C: RISK FACTORS

13. What have you been diagnosed with?

Chronic kidney disease[ ] Hypertension/heart failure[ ] Diabetes mellitus[ ] Hepatitis[ ] HIV[ ]

14. Have you experienced any of the following? (Tick all that apply)

Physical/emotional abuse[ ] Parental separation[ ] Loss of a loved one[ ] Divorce[ ] Not

applicable[ ]

15. Do you consider yourself to have low self-esteem?

Yes[ ] No[ ]

16. Have you ever been diagnosed with any mental illness?

Yes[ ] No[ ] Not sure[ ]

17. Is there a anyone in your family suffering from anxiety or any other mental illness?

[ ] Yes [ ] No

18. Do you have someone you can talk to about your worries?

Yes[ ] No[ ]

19. How would you rate the emotional support you receive?

Excellent[ ] Good[ ] Fair[ ] Poor[ ]

20. Have you experienced stigma because of your illness?

Yes[ ] No[ ]

21. How often do you feel overwhelmed by your illness or treatment?

Always[ ] Often[ ] Sometimes[ ] Rarely[ ] Never[ ]

22. Do you live alone

Yes[ ] No[ ]
